# Supplementary material
Source: PubMed Central journal article supplement (PMC2676950)
Supplement: supp_71.10.743_Whitwell.pdf [file supp_71.10.743_Whitwell.pdf]

# MRI は剖検時の神経原線維変化の病理所見と 相関する

ボクセルに基づく形態測定研究

MRI correlates of neurofibrillary tangle pathology at autopsy

A voxel-based morphometry study

<sup>§</sup>J.L. Whitwell, PhD  
 K.A. Josephs, MST, MD, MS  
 M.E. Murray, BS  
<sup>§</sup>K. Kantarci, MD  
 S.A. Przybelski, BS  
 S.D. Weigand, MS  
<sup>§</sup>P. Vemuri, PhD  
 M.L. Senjem, BS  
 J.E. Parisi, MD  
 D.S. Knopman, MD  
 B.F. Boeve, MD  
 R.C. Petersen, PhD, MD  
 D.W. Dickson, MD  
<sup>§</sup>C.R. Jack, Jr., MD

Address correspondence and  
 reprint requests to Dr. Clifford R.  
 Jack, Jr., Department of  
 Radiology, Mayo Clinic, 200  
 First St. SW, Rochester, MN  
 55905  
 jack.clifford@mayo.edu

## 要約

**背景:** 高リン酸化タウ蛋白から成る神経原線維変化 (NFT) は、アルツハイマー病 (AD) の病理学的特徴の 1 つである。本研究では、生存中の MRI で得られた灰白質萎縮パターンが NFT 病変の Braak 病期と相関するかどうかについて検討した。

**方法:** Braak 病期 III ~ VI (AD の確率が低~高の病理学的診断) で、死亡前の 4 年間に MRI を施行した患者 83 例を特定した。各病期の灰白質萎縮をボクセルに基づく形態測定 (VBM) により評価し、病理学的対照 20 例 (Braak 病期 0 ~ II) と比較した。

**結果:** Braak 病期 0 ~ II との対比では、Braak 病期 V および VI を通じて段階的变化が認められ、Braak 病期 VI ではより重度かつ広範囲の灰白質の減少が確認された。Braak 病期 III または IV では、Braak 病期 0 ~ II と比較して灰白質が減少した領域は確認されなかった。灰白質の減少が病期 III および IV で認められないのは、Braak 病期が AD 病変全体の重症度に関係なく NFT 病変の有無のみに基づいていることによると考えられる。実際、NFT 病変量は Braak 病期によって異なっていると推測される。そこで、Braak 病期 0 ~ IV の被験者についてタウ病変量を評価した。タウ病変量が多い被験者は、タウ病変量が少ない被験者より内側および外側側頭葉の灰白質減少量が大きかった。

**結論:** 灰白質減少パターンは NFT と相関しており、特に Braak 病期 III および IV の NFT 負荷、さらにより高い病期では Braak 病期そのものと相関する。この所見は、MRI による萎縮の三次元パターンが、アルツハイマー病における神経変性像の脳全体の分布を示す大まかな *in vivo* 指標となることを示している。

Neurology® 2008;71:743-749

| Table                                                   | Subject demographics and clinicopathologic classifications for all subjects by Braak stage |                  |                  |                   |                  |
|---------------------------------------------------------|--------------------------------------------------------------------------------------------|------------------|------------------|-------------------|------------------|
|                                                         | Controls, Braak stage 0-II (n = 20)                                                        | III (n = 10)     | IV (n = 13)      | V (n = 32)        | VI (n = 27)      |
| No. of women (%)                                        | 12 (60)                                                                                    | 7 (70)           | 6 (46)           | 18 (56)           | 18 (67)          |
| No. of APOE ε4 carriers (%)                             | 4 (20)                                                                                     | 6 (60)           | 5 (38)           | 16 (50)           | 17 (63)          |
| Education, y, median (range)                            | 15 (9-20)                                                                                  | 11 (7-16)        | 16 (9-18)        | 15 (9-20)         | 15 (9-18)        |
| Age at scan, y, median (range)                          | 80 (53-93)                                                                                 | 90 (81-100)      | 86 (72-93)       | 86 (59-98)        | 81 (49-92)       |
| Age at death, y, median (range)                         | 86 (57-99)                                                                                 | 92 (81-103)      | 88 (74-94)       | 87 (60-100)       | 83 (51-94)       |
| Time from scan to death, y, median (range)              | 4.8 (0.1-13.5)                                                                             | 1.7 (0.1-4.0)    | 1.6 (0.6-3.9)    | 1.8 (0.2-4.0)     | 2.3 (0.6-3.9)    |
| MMSE score, /30, median (range)                         | 28 (24-30)                                                                                 | 26 (18-30)       | 27 (19-30)       | 22 (12-29)        | 14 (7-29)        |
| CDR-SB, /18, median (range)                             | 0.0 (0-0.5)                                                                                | 2.3 (0-6.0)      | 0.0 (0-17.0)     | 7.0 (3-18.0)      | 10.0 (1.5-18.0)  |
| Clinical diagnosis at MRI, normal/aMCI/AD (%)           | 20/0/0 (100/0/0)                                                                           | 3/3/4 (30/30/40) | 7/3/3 (54/23/23) | 5/5/22 (16/16/68) | 0/1/26 (0/4/96)  |
| Clinical diagnosis at death, normal/aMCI/AD (%)         | 17/3/0 (85/15/0)                                                                           | 3/3/4 (30/30/40) | 7/3/3 (54/23/23) | 5/3/24 (16/9/75)  | 0/0/27 (0/0/100) |
| NIH-Reagan probability of AD, low/intermediate/high (%) | 20/0/0 (100/0/0)                                                                           | 6/3/1 (60/30/10) | 9/4/1 (69/31/7)  | 14/27 (31/84)     | 0/1/26 (0/4/96)  |
| McKeith probability of DLB, low/intermediate/high (%)   | 0                                                                                          | 0                | 0                | 2/6/29 (6/19/8)   | 2/3/27 (7/11/0)  |
| AGD present (%)                                         | 6 (30)                                                                                     | 3 (30)           | 2 (15)           | 3 (9)             | 0                |

Significant differences across groups at \*p < 0.05, †p < 0.001.  
 †One additional subject had Lewy body pathology confined to the amygdala.  
 MMSE = Mini-Mental State Examination; CDR-SB = Clinical Dementia Rating scale sum of boxes; aMCI = amnesic mild cognitive impairment; AD = Alzheimer disease; NA = National Institute on Aging; DLB = dementia with Lewy bodies; AGD = argyrophilic grains disease.

<sup>§</sup>Department of Radiology, Mayo Clinic, Rochester, MN, USA

**Figure 1** Patterns of gray matter loss on MRI in subjects with Braak stage III to IV, V, or VI when compared with the pathologic control group\*

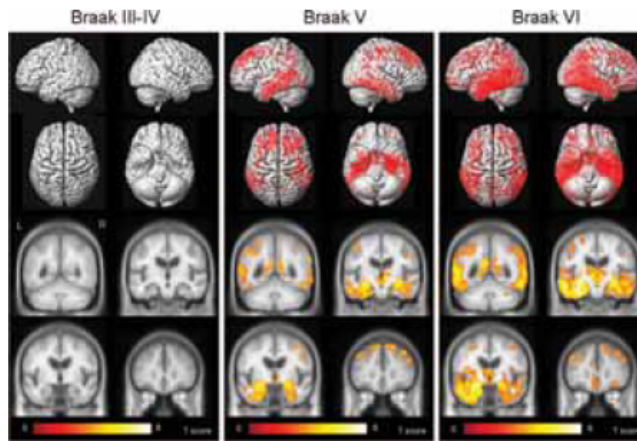

\*Corrected for multiple comparisons, false-discovery rate,  $p < 0.005$ . The patterns of cortical atrophy are shown on a three-dimensional surface render (top). In addition, the results are shown on representative coronal slices through the customized template (coordinates:  $y = -50, -15, -5, 35$ ; bottom).

**Figure 2** Relationship between tau burden and Braak stage in the 36 subjects with Braak stage 0 through IV

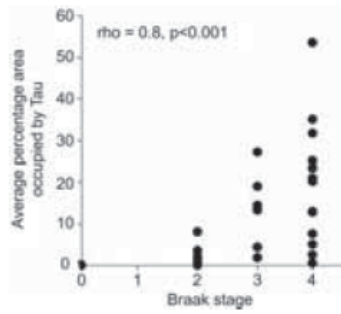

**Figure 3** Patterns of gray matter loss on MRI in subjects with Braak stage 0 through IV and high tau burden ( $\geq 10\%$ ) compared with subjects with Braak stage 0 through IV and low tau burden ( $< 10\%$ )

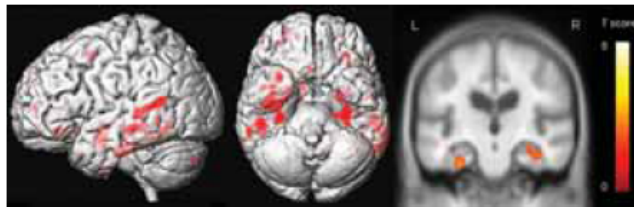

The patterns of atrophy are shown on a three-dimensional surface render and on a representative coronal slice through the temporal lobe.
